# Supplementary material
Source: PubMed Central journal article supplement (PMC11028426)
Supplement: 262_2014_1591_MOESM1_ESM.pdf [file 262_2014_1591_MOESM1_ESM.pdf]

Suppl. Figure 1

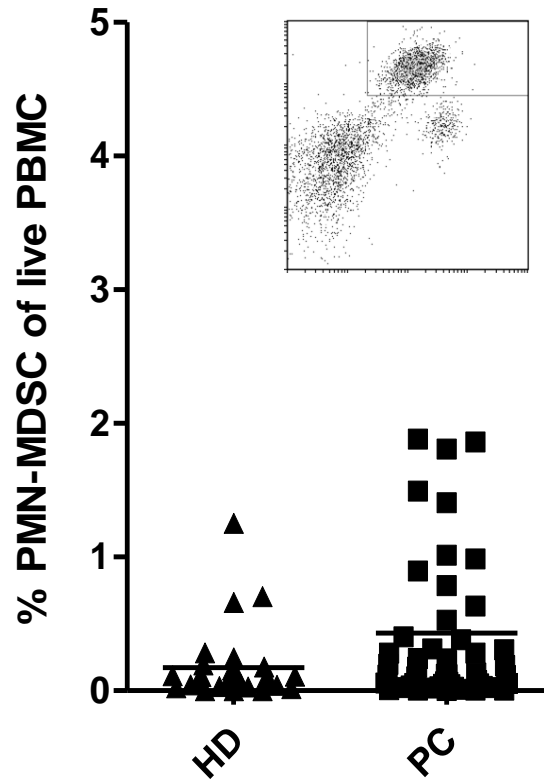

**Increased frequencies of PMN-MDSC in the blood of patients with PC.**

Frequencies of PMN-MDSC, initially gated as M-MDSC (HLA-DR<sup>neg/low</sup> Lin<sup>-</sup> CD33<sup>+</sup> CD11c<sup>+</sup> cells), further gated as CD15 CD66b double positive, tend to be higher in patients with PC compared to healthy donors.

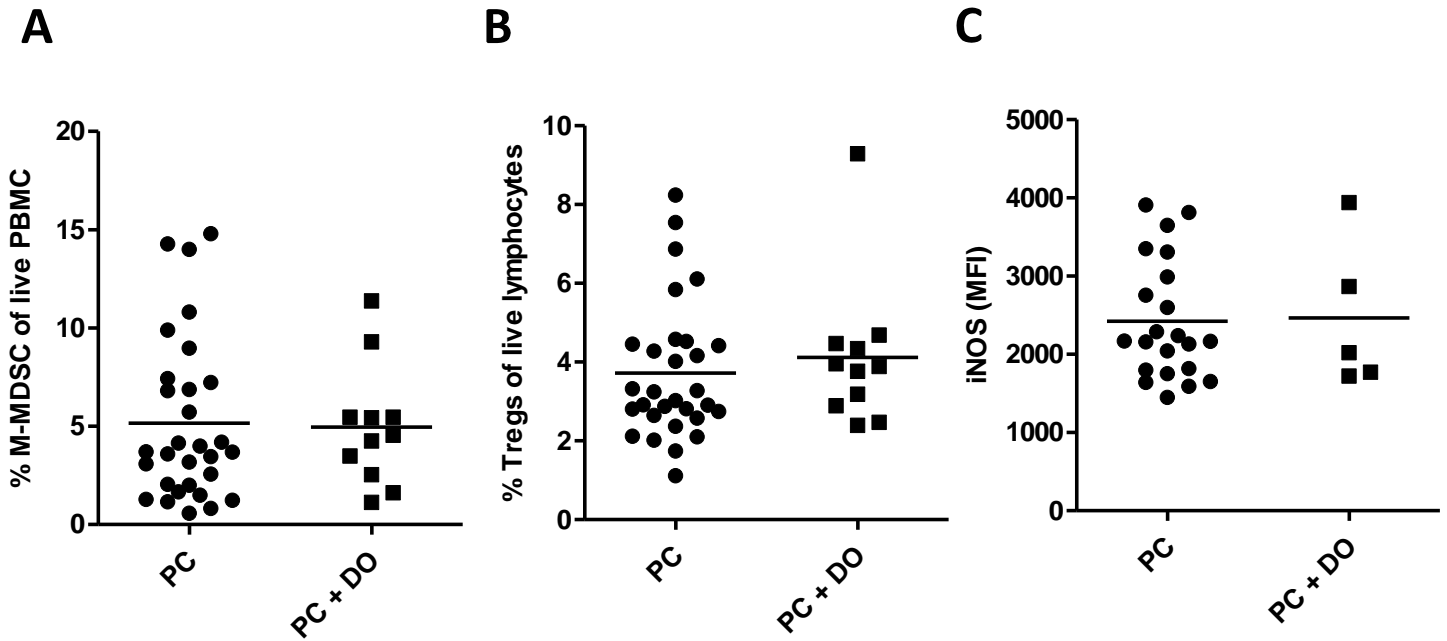

**Prior docetaxel treatment of a fraction of the patient cohort does not affect immune cell populations at the time of inclusion**

Distribution of immune suppressive cells, **A)** M-MDSC and **B)** Tregs in patients with prostate cancer is not affected by docetaxel treatment prior to inclusion in this study (PC, n=30, PC +DO, n=11). **C)** iNOS expression level in M-MDSC from untreated patients (n=22) and docetaxel treated patients (n=5). PC = Prostate cancer, DO = Docetaxel, MFI = Mean fluorescence intensity.

Suppl. Figure 3

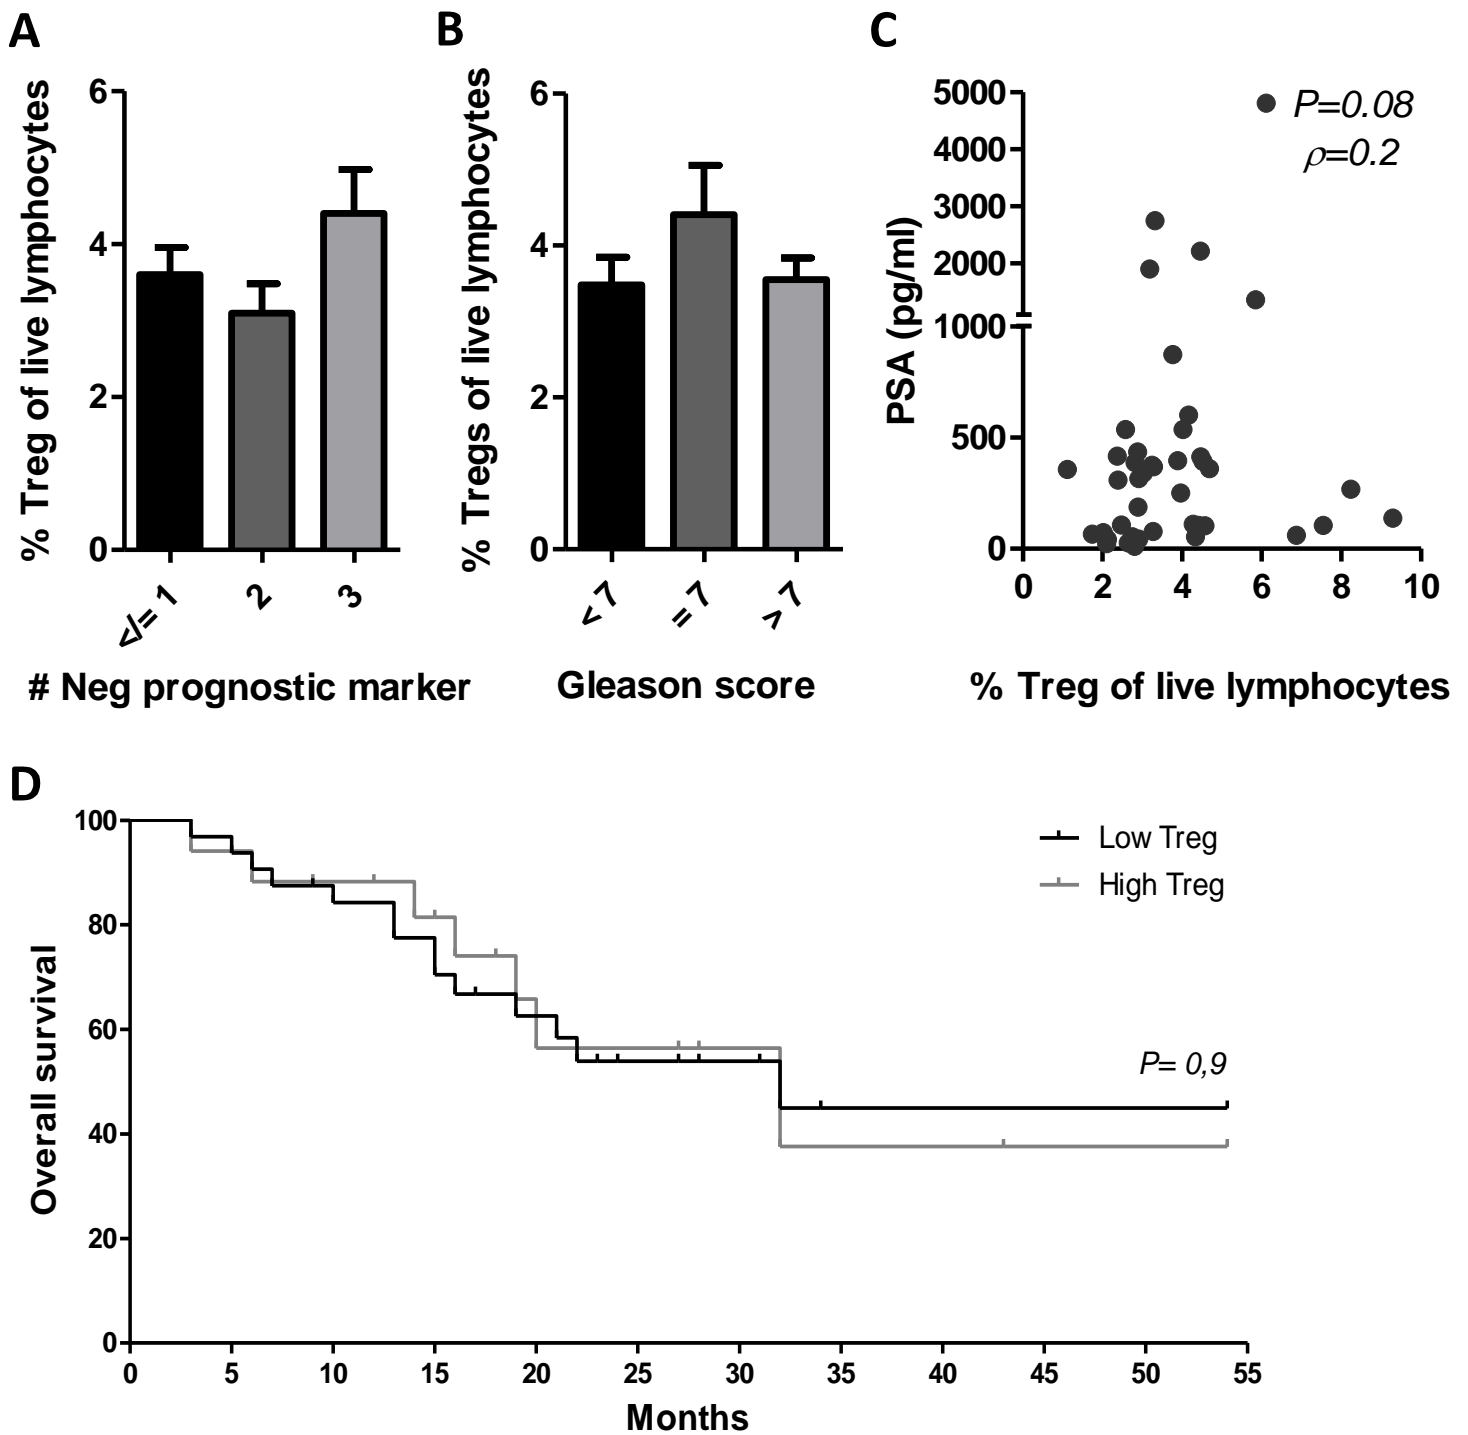

Treg levels does not correlate with negative prognostic markers or overall survival, but tend to correlate with plasma PSA. Patients stratified into groups; **A**) harbouring  $\leq 1$  (n=17), 2 (n=11) or 3 (n=13) independently negative prognostic markers or **B**) low ( $< 7$ , n=5), intermediate (7, n= 10) or high ( $> 7$ , n=25) gleason score at diagnosis. Mann-Whitney test, error bars designate standard error of the mean, SEM. **C**) Circulating Tregs and plasma PSA tend to correlate (n=41,  $P=0.08$ ,  $\rho=0.2$ , Spearman rank correlation test). **D**) Treg level does not impact OS.
